# Supplementary material
Source: PubMed Central journal article supplement (PMC3408831)
Supplement: NIHMS374792-supplement-01.pdf [file NIHMS374792-supplement-01.pdf]

Continuum modeling of neuronal cell under blast  
loading:  
Supplementary Materials

Antoine Jérusalem<sup>1</sup>

*IMDEA Materials Institute, C/ Profesor Aranguren s/n, 28040 Madrid, Spain*

Ming Dao

*Massachusetts Institute of Technology, 77 Massachusetts Avenue, Cambridge, MA 02139,  
USA*

---

---

1 **Supplementary Materials A: Finite element setup complementary**  
2 **information**

3 *A-1 Nanoindentation finite element setup*

4 The tremendous variability in geometry, function and structure of neu-  
5 rons [1], as well as the complexity of the cell structure evolution by protein  
6 deformation/reorganization and/or by the action of molecular motors and  
7 ionic gates [2, 3] cannot possibly be fully taken into account. As a conse-  
8 quence, simplifications for the model morphology coupled to an experimental  
9 setup chosen so as to *a priori* simplify the deformation mechanisms should  
10 be used. Bernick *et al.* proposed the use of a continuum semi-ellipsoid as  
11 a representative body of a cerebral cortex rat neuron [4]. The model was  
12 subjected to a series of *in vitro* indentations at different rates (in one unique

---

<sup>1</sup>antoine.jerusalem@imdea.org

13 run). The results were compared to an average of experimental results with  
14 the same loading conditions. Note that by inverting the order of the applied  
15 indentation velocities and observing the same rate effect experimentally, the  
16 authors confirmed the operating deformation mechanisms as passive mecha-  
17 nisms, *i.e.* without active remodeling of the cytoskeleton. The constitutive  
18 model chosen in this reference consists of a hyperelastic network and a set of  
19 Hooke and Newton models in parallel and series [4].

20 In our model, the chosen modeled continua are the nucleus, the cytoplasm  
21 and the cortex plus membrane. The nucleus envelope is composed of two  
22 bilipid membranes, pierced by multiple proteins and pores, supported by an  
23 underlying dense network of proteins (mainly lamina and chromatin) [5, 6].  
24 However, the membrane stiffness can be considered as insignificant when  
25 compared to the nuclear lamina and interior stiffness [6]. As a consequence,  
26 the nucleus is modeled here as a unique continuum with 3D finite elements for  
27 the blast simulations (2D axisymmetric elements for the nanoindentations)  
28 without envelope. Note that Vaziri *et al.* emphasized the need to model  
29 the nuclear envelope when sharp perturbations on the nucleus are considered  
30 [5]. However, all the nucleus (indirect) loadings observed in this work involve  
31 relatively diffuse nucleus deformation patterns, thus supporting our modeling  
32 assumption. The “cortex plus cell membrane” region, on the other hand, is  
33 significantly stiffer than the rest of the cytoplasm and intricately connected  
34 [7], and thus needs to be modeled independently [8]. In the approach followed  
35 here, we model cortex and membrane together by means of shell elements (or  
36 1D axisymmetric shell elements for nanoindentation). Finally, the cytoplasm  
37 and its constituents are modeled with 3D finite elements (or 2D axisymmetric

38 elements for nanoindentation).

39 The membrane/cortex is discretized with 54 linear axisymmetric shell el-  
40 ements (SAX1), the cytoplasm with 702 bilinear axisymmetric quadrilateral  
41 elements with hybrid, constant pressure, reduced integration, and hourglass  
42 control formulation (CAX4RH), and the nucleus with 905 of the same ele-  
43 ments and 14 linear axisymmetric triangle with hybrid and constant pressure  
44 formulation (CAX3H).

#### 45 *A-2 Blast finite element setup*

46 The membrane/cortex is discretized with 1761 linear triangular shell el-  
47 ements (S3), the cytoplasm with 16,949 linear tetrahedra (C3D4), and the  
48 nucleus with 7,948 linear tetrahedra (C3D4). The Eulerian finite element  
49 mesh of the box is constituted of 125,000 cubic elements (EC3D8R). Fluid  
50 material mass is assigned to each element as a function of its intersection  
51 with the solid Lagrangian mesh and a frictionless “hard contact” algorithm  
52 between the Eulerian mesh and the Lagrangian mesh is used [9]. In order to  
53 account for visco-hyperelasticity and volumetric equation of state, the solid  
54 elements were duplicated while keeping the same nodes and the constitutive  
55 models were adequately distributed.

56 The fluid box has frictionless reflective boundary conditions on all sides,  
57 except on the top face where a pressure loading is imposed. The cell bottom  
58 is constrained to the bottom of the box.

#### 59 *A-3 Artificial Viscosity*

Originally proposed by von Neumann and Richtmyer [10], the artificial  
viscosity aims at spreading the shock front over several elements in order to

enable the simulations of strong shocks of thickness smaller than the mesh size. The viscosity introduced in the calculations vanishes when the mesh size decreases and conserves the fundamental features of the shock, such as the shock speed or the jump conditions, while avoiding the high frequency spurious mode otherwise observed. The commercial software used in this work (Abaqus [9]) is using a similar formulation. An artificial bulk viscosity  $P_{av}$  term composed of a linear and quadratic terms is added to the pressure terms with

$$P_{av} = \rho l_e \dot{\epsilon}_v (b_1 c_d + l_e b_2^2 \dot{\epsilon}_v) \quad (1)$$

60 where  $b_1$  and  $b_2$  are damping coefficients,  $l_e$  is the characteristic element size,  
 61  $\epsilon_v$  is the volumetric strain, and  $c_d = \sqrt{\frac{\lambda+2\mu}{\rho}}$  is the dilatational wave speed,  $\lambda$   
 62 and  $\mu$  being the Lamé constants. Note that  $P_{av}$  must be subtracted to  $P$  in  
 63 the energy and momentum conservation equations not to affect the dynamics  
 64 of the problem.

65 Finally, it must be noted that, all these models being already embedded  
 66 in Abaqus [9], implementations in additional subroutines were not necessary.

The default parameters taken by Abaqus are:

$$\begin{cases} b_1 = 0.06 \\ b_2 = 1.2 \end{cases} \quad (2)$$

67 By checking that the artificial viscosity energy remains well below the  
 68 other energies of the problem, those values have been found to be a good  
 69 compromise.

70 **Supplementary Materials B: Model parameters literature review**

71 *B-1 Cortex and membrane*

72 As discussed above, both the bilipid membrane and the cortex are mod-  
73 eled by a unique layer of shell elements of 200 *nm* thickness. The corti-  
74 cal tension in neutrophils during phagocytosis has been intensively studied  
75 by Herant and coworkers and has been evaluated (before phagocytosis) to  
76 be approximatively 0.03  $mN.m^{-1}$  [11, 12, 13], which amounts to a mem-  
77 brane/cortex Young modulus of roughly  $\sim 100 Pa$ . Red blood cells seem to  
78 have a slightly higher value of  $\sim 300 Pa$  [14]. Overall though, putting aside  
79 the confusion that is often made by calling membrane what is in reality the  
80 cortex plus the membrane, and taking into account the fact that different  
81 cells have different properties, literature values seem to converge towards a  
82 Young Modulus of 1000  $Pa$  [15, 16], reaching close to 7,000  $Pa$  for myoblasts  
83 [17]. Additionally, the elastic modulus of the F-action network (and thus  
84 cortex) in the excitation range of 0.1—1  $Hz$  has also been reported to range  
85 from hundreds to thousands of pascals for neurons and neutrophils, and fi-  
86 broblasts respectively. Note finally that cortex bending stiffness is of the  
87 order of  $10^{-18} N.m$  and  $10^{-19} N.m$  for neutrophils and red blood cells respec-  
88 tively [8], which, using the area moment of inertia of a plate, leads to Young  
89 moduli of the order of 1000  $Pa$  and 100  $Pa$  respectively.

90 For neutrophils, the surface tension viscosity has been evaluated to 75  
91  $poise.cm = 75 \cdot 10^{-3} Pa.s.m$  (*i.e.*  $\eta_1^{mem} = 375 \cdot 10^3 Pa.s$ ) with a relaxation time  
92 of 3000  $s$  [11, 12].

93 *B-2 Nucleus and cytoplasm*

94 The long term Young modulus of cell nucleus has been directly estimated  
95 to be of the order of  $E_0^{nuc} = 1 \text{ kPa}$  for articular chondrocytes [18], and 5  
96  $\text{kPa}$  for myoblasts [17]. However, as reported by Vaziri *et al.*, other references  
97 diverge on this value, thus leading to the rather wide range of  $E_0^{nuc} \sim 10\text{--}10^4$   
98  $\text{Pa}$  [19, 20, 21, 5, 22]. Note that recent work on crosslinked/bundled actin  
99 filaments network by Lieleg *et al.* have reported values in the lower range  
100 ( $\sim 10\text{--}100 \text{ Pa}$ ) of these estimations [23].

101 The cytoskeleton<sup>2</sup> Young modulus has been evaluated to be 1.4 times  
102 lower than the one of the nucleus according to Ofek *et al.* [22], 3 to 4 times  
103 according to Guilak *et al.* [18], and 5 to 10 times according to Friedl *et al.*  
104 [6]. It was directly evaluated to be of the order of  $500 \text{ Pa}$  for endothelial  
105 cells by Caille *et al.* [19], but based on the nuclear stiffness range and the  
106 “rule-of-factor-3/10” between nucleus and cytoplasm, the acceptable range  
107 should be of  $E_0^{nuc} \sim 1\text{--}10^3 \text{ Pa}$ , one more time rather unreliable.

108 The typical viscoelastic time constant  $\tau_1^{nuc/cyto}$  seem to vary widely de-  
109 pending on the way the cell or cell component is tested (*e.g.* nucleus aspi-  
110 ration or cell compression with time constant of the order of tens of seconds  
111 [18, 24, 25], full glial cell stretch with time constant of the order of tenths  
112 of seconds [26], and seconds in neutrophil phagocytosis [13]). In the recent  
113 work of Lieleg *et al.* on crosslinked/bundled actin filaments network, con-  
114 verting their frequency domain viscosity values to time domain values yield  
115 time constants ranging from hundredths of seconds to seconds [23].

---

<sup>2</sup>protein networks, organelles and cytosol surrounding the nucleus and enclosed by the membrane

116 Finally, cytoplasmic viscosity has been evaluated to be in the range of  
117 300—600 *Pa.s* for neutrophils by Herant *et al.* [11, 13]. The work of Lieleg  
118 *et al.* on crosslinked/bundled actin filaments network reports values in the  
119 range  $\sim 1$ —500 *Pa.s* [23]. The nucleus has been estimated to be nearly twice  
120 as viscous as the cytoplasm [18]. A fibroblast nucleus viscosity of 52 *Pa.s*  
121 was directly measured by Tseng *et al.* [21].

## 122 **References**

- 123 [1] G.M. Shepherd, The synaptic organization of the brain, Oxford Univer-  
124 sity Press, 2004.
- 125 [2] C. Conde and A. Cáceres, Microtubule assembly, organization and dy-  
126 namics in axons and dendrites, Nature Reviews Neuroscience 10 (2009)  
127 319 – 332. doi:10.1038/nrn2631.
- 128 [3] N. Hirokawa, S. Niwa and Y. Tanaka, Molecular motors in neu-  
129 rons: transport mechanisms and roles in brain function, de-  
130 velopment, and disease, Neuron 68 (4) (2010) 610 – 638.  
131 doi:10.1016/j.neuron.2010.09.039.
- 132 [4] K.B. Bernick, T.P. Prevost, S. Suresh and S. Socrate, Biomechanics of  
133 single cortical neurons, Acta Biomaterialia 7 (3) (2011) 1210 – 1219.  
134 doi:10.1016/j.actbio.2010.10.018.
- 135 [5] A. Vaziri, H. Lee and M.R.K. Mofrad, Deformation of the cell nucleus  
136 under indentation: Mechanics and mechanisms, Journal of Materials  
137 Research 21 (8) (2006) 2126 – 2135. doi:10.1557/JMR.2006.0262.

- 138 [6] P. Friedl, K. Wolf and J. Lammerding, Nuclear mechanics dur-  
139 ing cell migration, *Current Opinion in Cell Biology* In Press.  
140 doi:10.1016/j.ceb.2010.10.015.
- 141 [7] M.R.K. Mofrad and R.D. Kamm, *Cytoskeletal mechanics, models and*  
142 *measurements*, Cambridge University Press, 2006.
- 143 [8] H. Karcher, J. Lammerding, H. Huang, R.T. Lee, R.D. Kamm and M.R.  
144 Kaazempur-Mofrad, A three-dimensional viscoelastic model for cell de-  
145 formation with experimental verification, *Biophysical Journal* 85 (2003)  
146 3336 – 3349. doi:10.1016/S0006-3495(03)74753-5.
- 147 [9] Simulia, *Abaqus 6.10* (2010).
- 148 [10] J. VonNeumann and R.D. Richtmyer, A method for the numerical cal-  
149 culation of hydrodynamic shocks, *Journal of Applied Physics* 21 (1950)  
150 232 – 237. doi:10.1063/1.1699639.
- 151 [11] W. M. M. Herant, M. Dembo, The mechanics of neutrophils: synthetic  
152 modeling of three experiments, *Biophysical Journal* 84 (2003) 3389 –  
153 3413. doi:10.1016/S0006-3495(03)70062-9.
- 154 [12] M. Herant, V. Heinrich and M. Dembo, Mechanics of neutrophil phago-  
155 cytosis: behavior of the cortical tension, *Journal of Cell Science* 118 (9)  
156 (2005) 1789 – 1797. doi:10.1242/jcs.02275.
- 157 [13] M. Herant, V. Heinrich and M. Dembo, Mechanics of neutrophil phago-  
158 cytosis: experiments and quantitative models, *Journal of Cell Science*  
159 119 (9) (2006) 1903 – 1913. doi:10.1242/jcs.02876.



- 160 [14] M. Dao, C.T. Lim and S. Suresh, Mechanics of the human red blood cell  
161 deformed by optical tweezers, *Journal of the Mechanics and Physics of*  
162 *Solids* 51 (2003) 2259 – 2280. doi:10.1016/j.jmps.2003.09.019.
- 163 [15] J.G. McGarry and P.J. Prendergast, A three-dimensional finite element  
164 model of an adherent eukaryotic cell, *European Cells and Materials* 7  
165 (2004) 27 – 33.
- 166 [16] N. Abolfathi, G. Karami and M. Ziejewski, Biomechanical cell modeling under impact loading, *International Journal of Modelling and Simulation* 28 (4) (2008) 470 – 476. doi:10.2316/Journal.205.2008.4.205-4877.
- 170 [17] N. Slomka and A. Gefen, Confocal microscopy-based three-dimensional cell-specific modeling for large deformation analyses in cellular mechanics, *Journal of Biomechanics* 43 (2010) 1806 – 1816. doi:10.1016/j.jbiomech.2010.02.011.
- 174 [18] F. Guilak, J.R. Tedrow and R. Burgkart, Viscoelastic properties of the cell nucleus, *Biochemical and Biophysical Research Communications* 269 (2000) 781 – 786. doi:10.1006/bbrc.2000.2360.
- 177 [19] N. Caille, O. Thoumine, Y. Tardy and J.-J. Meister, Contribution of the nucleus to the mechanical properties of endothelial cells, *Journal of Biomechanics* 35 (2) (2002) 177 – 187. doi:10.1016/S0021-9290(01)00201-9.
- 181 [20] K.N. Dahl, A.J. Engler, J.D. Pajerowski and D.E. Discher, Power-law rheology of isolated nuclei with deformation mapping of nu-
- 182

- 183 clear substructures, *Biophysical Journal* 89 (4) (2005) 2855 – 2864.  
184 doi:10.1529/biophysj.105.062554.
- 185 [21] Y. Tseng., J.S.H. Lee, T.P. Kole, I. Jiang and D. Wirtz, Micro-  
186 organization and visco-elasticity of the interphase nucleus revealed by  
187 particle nanotracking, *Journal of Cell Science* 117 (2004) 2159 – 2167.  
188 doi:10.1242/jcs.01073.
- 189 [22] G. Ofek, R.M. Natoli, K.A. Athanasiou, In situ mechanical properties  
190 of the chondrocyte cytoplasm and nucleus, *Journal of Biomechanics* 42  
191 (2009) 873 – 877. doi:10.1016/j.jbiomech.2009.01.024.
- 192 [23] O. Lieleg, J. Kayser, G. Brambilla, L. Cipelletti and A.R. Bausch, Slow  
193 dynamics and internal stress relaxation in bundled cytoskeletal net-  
194 works, *Nature Materials* 10 (2011) 236 – 242. doi:10.1038/nmat2939.
- 195 [24] A.G. Peeters, C.W.J. Oomens, C.V.C. Bouten, D.L. Bader and F.P.T.  
196 Baaijens, Viscoelastic properties of single attached cells under com-  
197 pression, *Journal of Biomechanical Engineering* 127 (2005) 237 – 243.  
198 doi:10.1115/1.1865198.
- 199 [25] J.P. McGarry, Characterization of cell mechanical properties by compu-  
200 tational modeling of parallel plate compression, *Annals of Biomedical*  
201 *Engineering* 37 (2009) 2317 – 2325. doi:10.1007/s10439-009-9772-4.
- 202 [26] Y.-B. Lu., K. Franze, G. Seifert, C. Steinhauser, F. Kirchhoff, H. Wol-  
203 burg, J. Guck, P. Janmey, E.-Q. Wei, J. Kas, and A. Reichenbach,  
204 Viscoelastic properties of individual glial cells and neurons in the CNS,  
205 *PNAS* 103 (47) (2006) 17759 – 17764. doi:10.1073/pnas.0606150103.
